# Supplementary material
Source: publisher site journal article supplement (https://www.dovepress.com/article/216274)
Supplement: Supplementary file 1 [file get_supplementary_file.php]

# **Appendix: Topic List used for ‘The attitudes of pulmonologists regarding smoking behaviour of their patients with advanced COPD: a qualitative research’**

| **Main topic** | **Subtopics** | **Examples of questions/keywords** |
| --- | --- | --- |
| Attitude regarding smoking | Public health | *What are your opinions on smoking/the problems around smoking?* |
| Smoking as addiction | *How do you initiate the conversation on smoking behavior?*  Is smoking seen as a disease/addiction or as a free choice? |
| Responsibility | *Where lies the problem according to you?*   - Can someone be held responsible? If so, who? |
| Attitude regarding COPD and smoking behavior | Patient as the one to blame | *Which role have the patients in the course/development of their own disease?*   - Are they to blame? |
| Feelings of physician | *How do you feel when patients keep smoking, despite your advice?*   - Difference in compassion - Frustration/powerlessness - Feeling useless as a physician |
| Behavior (of illness) of patients | *What do you notice from patients in contact/treatment/searching for help?*   - How frank are patients - Avoid seeking health care |
| Impact stigma | - Stress, fear? - Shame perceived by patients |
| Influence on communication | *How do you deal with patients with COPD who keep smoking? How do you communicae this with them?* |
| Quality of healthcare | - Not being in one line with the patients - Less motivation from the physician and patient? Compliance? - Less support given? |
